# Supplementary material for: Direct Growth of Nitrogen-Doped Carbon Quantum Dots on Co9S8 Passivated on Cotton Fabric as an Efficient Photoelectrode for Water Treatment
Source: PubMed Central journal article supplement — ACS Omega. 2023 Oct 23;8(44):41064–76. doi: 10.1021/acsomega.3c03407 (PMC10633820; doi:10.1021/acsomega.3c03407), 2023-10-23
Supplement: ao3c03407_si_001.pdf [file ao3c03407_si_001.pdf]

## Supporting Information

### **Direct growth of nitrogen-doped carbon quantum dots (NCQDs) on Co<sub>9</sub>S<sub>8</sub> passivated on cotton fabric as an efficient photoelectrode for water treatment.**

Kinza Shahid<sup>a</sup>, Mubark Alshareef<sup>b</sup>, Mumtaz Ali<sup>c</sup>, Muhammad Imran Yousaf<sup>a\*</sup>, Marwah M. Alsowayigh<sup>d</sup>, Imtiaz afzal khan<sup>e</sup>

<sup>a</sup>Department of Applied Sciences, National Textile University, Faisalabad Pakistan

<sup>b</sup>Department of Chemistry, Faculty of Applied Science, Umm Al Qura University, Makkah 24230, Saudi Arabia

<sup>c</sup>Department of Textile Engineering, National Textile University, Faisalabad Pakistan

<sup>d</sup>Chemistry Department, College of Science, King Faisal University, P.O. 380, Al-Ahsa 31982, Kingdom of Saudia Arabia

<sup>e</sup>Department of Civil and Environmental Engineering, Hanyang University, 222 Wangsimni-ro, Seongdong-gu, Seoul, 04763, Republic of Korea

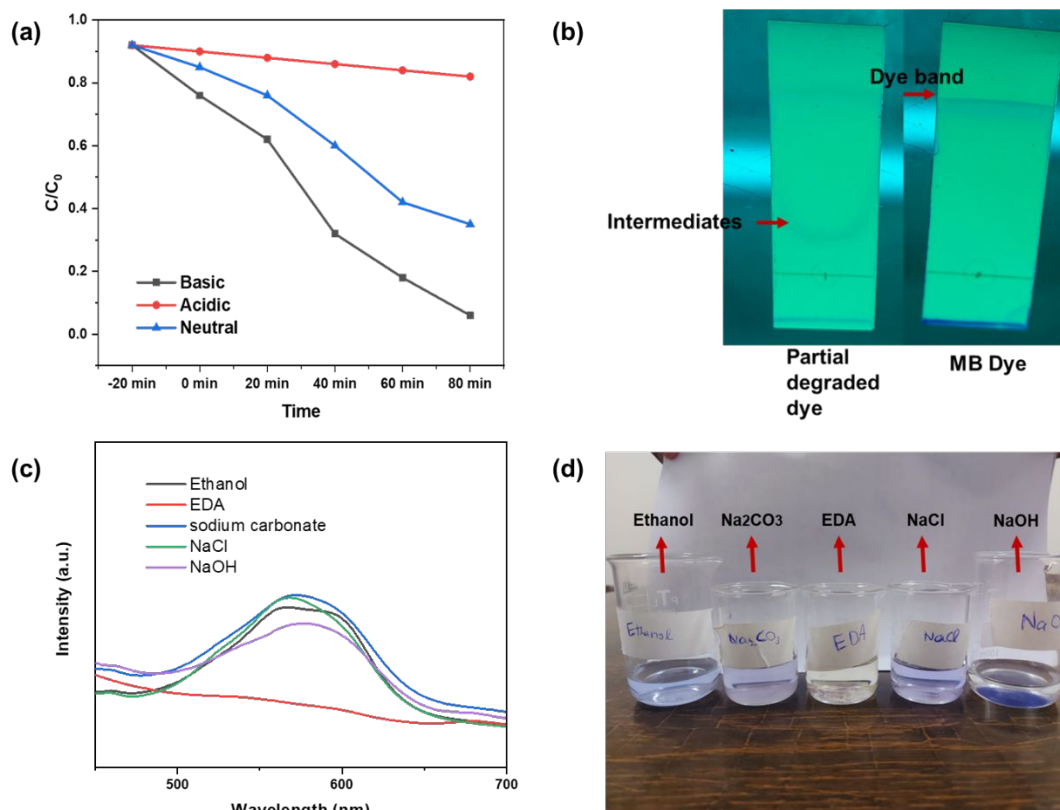

Figure S1. (a) The effect of solution pH on the degradation kinetics graph. (b) TLC plates with MB dye solution and partially degraded dye solution. (c) UV-visible absorption of NCQDs-G@ $\text{Co}_9\text{S}_8$  (d) Degraded solution of MB dye with the addition of scavengers.

In recent studies, the reaction materials used are in powder form whereas the material used in our work is in the passivated form. The photodegradation efficiency of these papers are comparable even though, our material is not in powder form and its efficiency is significantly better than other papers as compared in Table S1.

Table S1. Comparison of dye degradation using different photocatalysts

| Dye | Material         | Phase        | Efficiency | Time    | Method                 | Reference |
|-----|------------------|--------------|------------|---------|------------------------|-----------|
| MB  | $\text{MnTiO}_3$ | Mobile phase | 70%        | 240 min | Sol-gel                | [10]      |
| MB  | ZnO              | Mobile phase | 81%, 92.5% | 3 hr    | Precipitation, Sol-gel | [11]      |

|    |                                                                                         |                  |      |         |                                              |      |
|----|-----------------------------------------------------------------------------------------|------------------|------|---------|----------------------------------------------|------|
| MB | TiO <sub>2</sub> /rGO                                                                   | Mobile phase     | 92%  | 120 min | Hummer's method                              | [12] |
| MB | Hybrid kaolin/TiO <sub>2</sub>                                                          | Mobile phase     | 90%  | 270 min | Wet precipitation method                     | [13] |
| MB | N-doped TiO <sub>2</sub><br>PNIPAM-co-PAA<br>microgels                                  | Mobile phase     | 95%  | 150 min | Sol-gel method                               | [14] |
| MB | TiO <sub>2</sub> -zeolites                                                              | Mobile phase     | 96%  | 180 min | Liquid impregnation method                   | [15] |
| MB | PVDF/GO/ZnO                                                                             | Mobile phase     | 86 % | 180 min | Immersion-precipitation phase transformation | [16] |
| MB | Graphene oxide/poly (vinyl alcohol)/TiO <sub>2</sub> microspheres<br>TiO <sub>2</sub> v | Mobile phase     | 95 % | 180 min | One-pot synthesis                            | [17] |
| MB | Cobalt sulphide/NCQDS                                                                   | Passivated phase | 92%  | 80 min  | Growth on fabric by hydrothermal method      |      |

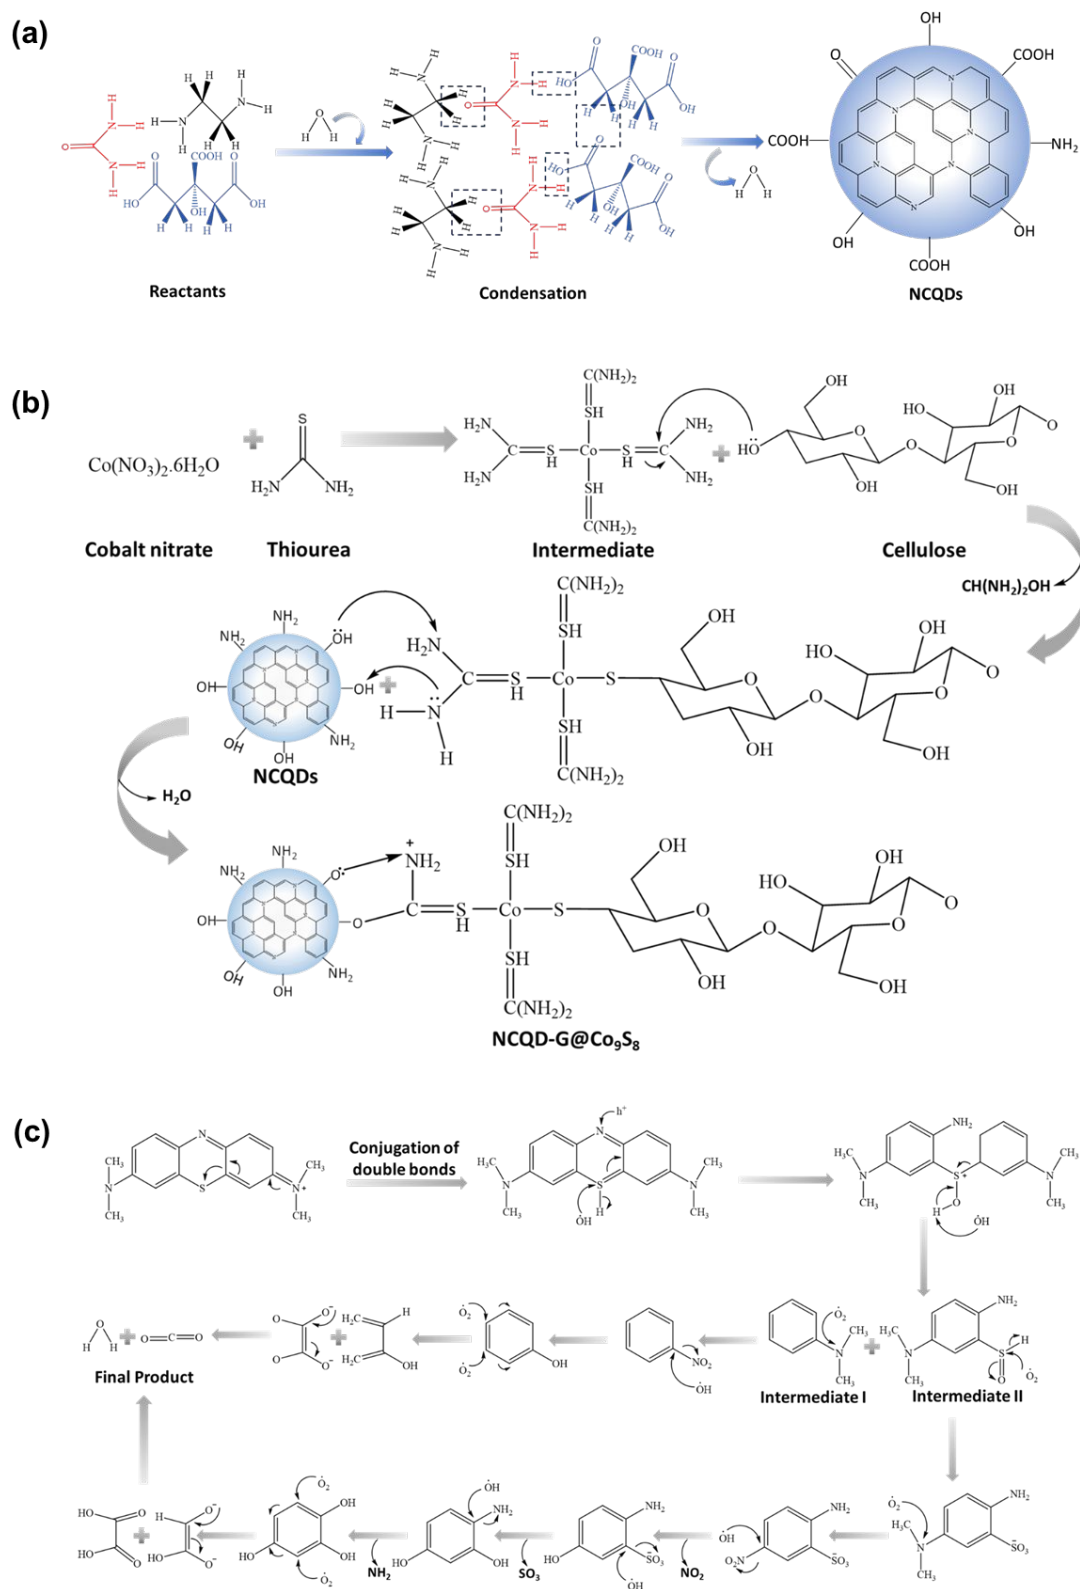

Figure S2. (a) structure of NCQDs. (b) Methodology of Co<sub>9</sub>S<sub>8</sub> growth on cotton fabric and growth of NCQDs. (c) The proposed photocatalytic degradation mechanism MB Dye.
